# Supplementary material for: Synergistic engineering of shell thickness and core ordering to boost the oxygen reduction performance
Source: Royal Society of Chemistry journal article supplement (doi:10.1039/d2cp00861k), 2022-01-01
Supplement: d2cp00861k1.pdf [file d2cp00861k1.pdf]

**Supporting information for:**

**Synergistically engineering of shell thickness and core ordering to  
boost the oxygen reduction performance**

Lijie Zhong,<sup>a</sup> Xingming Zhang,<sup>a</sup> Liang Wang,<sup>a</sup> Dingwang Yuan,<sup>b</sup> Huiqiu Deng,<sup>c</sup> Jianfeng Tang,<sup>\*a</sup> Lei Deng,<sup>\*a</sup>

<sup>a</sup> School of Chemistry and Materials Science, Hunan Agricultural University

<sup>b</sup> College of Materials Science and Engineering, Hunan University

<sup>c</sup> School of Physics and Electronics, Hunan University

Coordinate files of L1<sub>0</sub>, L1<sub>1</sub>, L1<sub>2</sub> and L1<sub>3</sub> ordered phases(\*.vasp file).

**L1<sub>0</sub> phase:**

**L10.vasp**

**1.0**

|                     |                     |                     |
|---------------------|---------------------|---------------------|
| <b>7.9539999962</b> | <b>0.0000000000</b> | <b>0.0000000000</b> |
| <b>0.0000000000</b> | <b>7.9539999962</b> | <b>0.0000000000</b> |
| <b>0.0000000000</b> | <b>0.0000000000</b> | <b>7.9539999962</b> |

**Pt TM**

**16 16**

**Direct**

|                   |                   |                   |
|-------------------|-------------------|-------------------|
| <b>0.00000000</b> | <b>0.00000000</b> | <b>0.00000000</b> |
| <b>0.25000000</b> | <b>0.25000000</b> | <b>0.00000000</b> |
| <b>0.50000000</b> | <b>0.00000000</b> | <b>0.00000000</b> |
| <b>0.75000000</b> | <b>0.25000000</b> | <b>0.00000000</b> |
| <b>0.00000000</b> | <b>0.50000000</b> | <b>0.00000000</b> |
| <b>0.25000000</b> | <b>0.75000000</b> | <b>0.00000000</b> |
| <b>0.50000000</b> | <b>0.50000000</b> | <b>0.00000000</b> |
| <b>0.75000000</b> | <b>0.75000000</b> | <b>0.00000000</b> |
| <b>0.00000000</b> | <b>0.00000000</b> | <b>0.50000000</b> |
| <b>0.25000000</b> | <b>0.25000000</b> | <b>0.50000000</b> |
| <b>0.50000000</b> | <b>0.00000000</b> | <b>0.50000000</b> |
| <b>0.75000000</b> | <b>0.25000000</b> | <b>0.50000000</b> |
| <b>0.00000000</b> | <b>0.50000000</b> | <b>0.50000000</b> |
| <b>0.25000000</b> | <b>0.75000000</b> | <b>0.50000000</b> |
| <b>0.50000000</b> | <b>0.50000000</b> | <b>0.50000000</b> |
| <b>0.75000000</b> | <b>0.75000000</b> | <b>0.50000000</b> |
| <b>0.00000000</b> | <b>0.25000000</b> | <b>0.25000000</b> |
| <b>0.25000000</b> | <b>0.00000000</b> | <b>0.25000000</b> |
| <b>0.50000000</b> | <b>0.25000000</b> | <b>0.25000000</b> |
| <b>0.75000000</b> | <b>0.00000000</b> | <b>0.25000000</b> |
| <b>0.00000000</b> | <b>0.75000000</b> | <b>0.25000000</b> |
| <b>0.25000000</b> | <b>0.50000000</b> | <b>0.25000000</b> |
| <b>0.50000000</b> | <b>0.75000000</b> | <b>0.25000000</b> |
| <b>0.75000000</b> | <b>0.50000000</b> | <b>0.25000000</b> |
| <b>0.00000000</b> | <b>0.25000000</b> | <b>0.75000000</b> |
| <b>0.25000000</b> | <b>0.00000000</b> | <b>0.75000000</b> |
| <b>0.50000000</b> | <b>0.25000000</b> | <b>0.75000000</b> |
| <b>0.75000000</b> | <b>0.00000000</b> | <b>0.75000000</b> |
| <b>0.00000000</b> | <b>0.75000000</b> | <b>0.75000000</b> |
| <b>0.25000000</b> | <b>0.50000000</b> | <b>0.75000000</b> |
| <b>0.50000000</b> | <b>0.75000000</b> | <b>0.75000000</b> |
| <b>0.75000000</b> | <b>0.50000000</b> | <b>0.75000000</b> |

L1<sub>1</sub> phase:

L11.vasp

1.0

|              |              |              |
|--------------|--------------|--------------|
| 7.9539999962 | 0.0000000000 | 0.0000000000 |
| 0.0000000000 | 7.9539999962 | 0.0000000000 |
| 0.0000000000 | 0.0000000000 | 7.9539999962 |

Pt TM

16 16

Direct

|             |             |             |
|-------------|-------------|-------------|
| 0.000000000 | 0.000000000 | 0.000000000 |
| 0.500000000 | 0.250000000 | 0.250000000 |
| 0.750000000 | 0.000000000 | 0.250000000 |
| 0.750000000 | 0.250000000 | 0.000000000 |
| 0.000000000 | 0.750000000 | 0.250000000 |
| 0.250000000 | 0.500000000 | 0.250000000 |
| 0.250000000 | 0.750000000 | 0.000000000 |
| 0.500000000 | 0.500000000 | 0.000000000 |
| 0.000000000 | 0.250000000 | 0.750000000 |
| 0.250000000 | 0.000000000 | 0.750000000 |
| 0.250000000 | 0.250000000 | 0.500000000 |
| 0.500000000 | 0.000000000 | 0.500000000 |
| 0.000000000 | 0.500000000 | 0.500000000 |
| 0.500000000 | 0.750000000 | 0.750000000 |
| 0.750000000 | 0.500000000 | 0.750000000 |
| 0.750000000 | 0.750000000 | 0.500000000 |
| 0.000000000 | 0.250000000 | 0.250000000 |
| 0.250000000 | 0.000000000 | 0.250000000 |
| 0.250000000 | 0.250000000 | 0.000000000 |
| 0.500000000 | 0.000000000 | 0.000000000 |
| 0.000000000 | 0.500000000 | 0.000000000 |
| 0.500000000 | 0.750000000 | 0.250000000 |
| 0.750000000 | 0.500000000 | 0.250000000 |
| 0.750000000 | 0.750000000 | 0.000000000 |
| 0.000000000 | 0.000000000 | 0.500000000 |
| 0.500000000 | 0.250000000 | 0.750000000 |
| 0.750000000 | 0.000000000 | 0.750000000 |
| 0.750000000 | 0.250000000 | 0.500000000 |
| 0.000000000 | 0.750000000 | 0.750000000 |
| 0.250000000 | 0.500000000 | 0.750000000 |
| 0.250000000 | 0.750000000 | 0.500000000 |
| 0.500000000 | 0.500000000 | 0.500000000 |

L1<sub>2</sub> phase:

L12-Pt rich(Pt poor).vasp

1.0

|              |              |              |
|--------------|--------------|--------------|
| 7.9539999962 | 0.0000000000 | 0.0000000000 |
| 0.0000000000 | 7.9539999962 | 0.0000000000 |
| 0.0000000000 | 0.0000000000 | 7.9539999962 |

Pt(TM) TM(Pt)

24 8

Direct

|             |             |             |
|-------------|-------------|-------------|
| 0.000000000 | 0.000000000 | 0.000000000 |
| 0.250000000 | 0.250000000 | 0.000000000 |
| 0.000000000 | 0.250000000 | 0.250000000 |
| 0.500000000 | 0.000000000 | 0.000000000 |
| 0.750000000 | 0.250000000 | 0.000000000 |
| 0.500000000 | 0.250000000 | 0.250000000 |
| 0.000000000 | 0.500000000 | 0.000000000 |
| 0.250000000 | 0.750000000 | 0.000000000 |
| 0.000000000 | 0.750000000 | 0.250000000 |
| 0.500000000 | 0.500000000 | 0.000000000 |
| 0.750000000 | 0.750000000 | 0.000000000 |
| 0.500000000 | 0.750000000 | 0.250000000 |
| 0.000000000 | 0.000000000 | 0.500000000 |
| 0.250000000 | 0.250000000 | 0.500000000 |
| 0.000000000 | 0.250000000 | 0.750000000 |
| 0.500000000 | 0.000000000 | 0.500000000 |
| 0.750000000 | 0.250000000 | 0.500000000 |
| 0.500000000 | 0.250000000 | 0.750000000 |
| 0.000000000 | 0.500000000 | 0.500000000 |
| 0.250000000 | 0.750000000 | 0.500000000 |
| 0.000000000 | 0.750000000 | 0.750000000 |
| 0.500000000 | 0.500000000 | 0.500000000 |
| 0.750000000 | 0.750000000 | 0.500000000 |
| 0.500000000 | 0.750000000 | 0.750000000 |
| 0.250000000 | 0.000000000 | 0.250000000 |
| 0.750000000 | 0.000000000 | 0.250000000 |
| 0.250000000 | 0.500000000 | 0.250000000 |
| 0.750000000 | 0.500000000 | 0.250000000 |
| 0.250000000 | 0.000000000 | 0.750000000 |
| 0.750000000 | 0.000000000 | 0.750000000 |
| 0.250000000 | 0.500000000 | 0.750000000 |
| 0.750000000 | 0.500000000 | 0.750000000 |

L1<sub>3</sub> phase:

L13-Pt rich(Pt poor).vasp

1.0

|              |              |              |
|--------------|--------------|--------------|
| 7.9539999962 | 0.0000000000 | 0.0000000000 |
| 0.0000000000 | 7.9539999962 | 0.0000000000 |
| 0.0000000000 | 0.0000000000 | 7.9539999962 |

Pt(TM) TM(Pt)

24 8

Direct

|              |              |              |
|--------------|--------------|--------------|
| 0.0000000000 | 0.0000000000 | 0.0000000000 |
| 0.0000000000 | 0.2500000000 | 0.2500000000 |
| 0.2500000000 | 0.0000000000 | 0.2500000000 |
| 0.5000000000 | 0.2500000000 | 0.2500000000 |
| 0.7500000000 | 0.0000000000 | 0.2500000000 |
| 0.7500000000 | 0.2500000000 | 0.0000000000 |
| 0.0000000000 | 0.7500000000 | 0.2500000000 |
| 0.2500000000 | 0.5000000000 | 0.2500000000 |
| 0.2500000000 | 0.7500000000 | 0.0000000000 |
| 0.5000000000 | 0.5000000000 | 0.0000000000 |
| 0.5000000000 | 0.7500000000 | 0.2500000000 |
| 0.7500000000 | 0.5000000000 | 0.2500000000 |
| 0.0000000000 | 0.2500000000 | 0.7500000000 |
| 0.2500000000 | 0.0000000000 | 0.7500000000 |
| 0.2500000000 | 0.2500000000 | 0.5000000000 |
| 0.5000000000 | 0.0000000000 | 0.5000000000 |
| 0.5000000000 | 0.2500000000 | 0.7500000000 |
| 0.7500000000 | 0.0000000000 | 0.7500000000 |
| 0.0000000000 | 0.5000000000 | 0.5000000000 |
| 0.0000000000 | 0.7500000000 | 0.7500000000 |
| 0.2500000000 | 0.5000000000 | 0.7500000000 |
| 0.5000000000 | 0.7500000000 | 0.7500000000 |
| 0.7500000000 | 0.5000000000 | 0.7500000000 |
| 0.7500000000 | 0.7500000000 | 0.5000000000 |
| 0.2500000000 | 0.2500000000 | 0.0000000000 |
| 0.5000000000 | 0.0000000000 | 0.0000000000 |
| 0.0000000000 | 0.5000000000 | 0.0000000000 |
| 0.7500000000 | 0.7500000000 | 0.0000000000 |
| 0.0000000000 | 0.0000000000 | 0.5000000000 |
| 0.7500000000 | 0.2500000000 | 0.5000000000 |
| 0.2500000000 | 0.7500000000 | 0.5000000000 |
| 0.5000000000 | 0.5000000000 | 0.5000000000 |

Table S1 The structural parameters of PtTM alloys

| Pt : TM = 1 : 1 |                                                             |                                                         |
|-----------------|-------------------------------------------------------------|---------------------------------------------------------|
| metal           | L1 <sub>0</sub> *                                           | L1 <sub>1</sub> *                                       |
| Fe              | a=b=3.87; c=3.77 (-2.69%)<br>$\alpha=\beta=\gamma=90^\circ$ | a=b=c=3.94 (-0.93%)<br>$\alpha=\beta=\gamma=90.7^\circ$ |
| Co              | a=b=3.82; c=3.73 (-3.95%)<br>$\alpha=\beta=\gamma=90^\circ$ | a=b=c=3.80 (-4.45%)<br>$\alpha=\beta=\gamma=91.0^\circ$ |
| Ni              | a=b=3.85; c=3.64 (-3.19%)<br>$\alpha=\beta=\gamma=90^\circ$ | a=b=c=3.80 (-4.45%)<br>$\alpha=\beta=\gamma=91.7^\circ$ |
| V               | a=b=3.83; c=3.92 (-3.70%)<br>$\alpha=\beta=\gamma=90^\circ$ | a=b=c=3.88 (-2.44%)<br>$\alpha=\beta=\gamma=90.1^\circ$ |
| Cu              | a=b=3.93; c=3.63 (-1.18%)<br>$\alpha=\beta=\gamma=90^\circ$ | a=b=c=3.84 (-3.44%)<br>$\alpha=\beta=\gamma=91.7^\circ$ |
| Ag              | a=b=3.95; c=4.29 (-0.68%)<br>$\alpha=\beta=\gamma=90^\circ$ | a=b=c=4.05 (1.84%)<br>$\alpha=\beta=\gamma=88.8^\circ$  |
| Pd              | a=b=3.98; c=3.93 (-0.08%)<br>$\alpha=\beta=\gamma=90^\circ$ | a=b=c=3.96 (-0.43%)<br>$\alpha=\beta=\gamma=89.7^\circ$ |

\*The unit of lattice constants is Ångstrom.

Table S2 The structural parameters of Pt<sub>3</sub>M alloys

| Pt : TM = 3 : 1 |                                                       |                                                                         |
|-----------------|-------------------------------------------------------|-------------------------------------------------------------------------|
| metal           | L1 <sub>2</sub> *                                     | L1 <sub>3</sub> *                                                       |
| Fe              | a=b=c=3.77 (-5.20%)<br>$\alpha=\beta=\gamma=90^\circ$ | a=b=c=3.92 (-1.43%)<br>$\alpha=\beta=90^\circ; \gamma=89.6^\circ$       |
| Co              | a=b=c=3.89 (-2.19%)<br>$\alpha=\beta=\gamma=90^\circ$ | a=b=c=3.90 (-1.94%)<br>$\alpha=\beta=90^\circ; \gamma=89.6^\circ$       |
| Ni              | a=b=c=3.89 (-2.19%)<br>$\alpha=\beta=\gamma=90^\circ$ | a=b=3.90; c=3.86 (-1.94%)<br>$\alpha=\beta=90^\circ; \gamma=89.4^\circ$ |
| V               | a=b=c=3.92 (-1.43%)<br>$\alpha=\beta=\gamma=90^\circ$ | a=b=3.92; c=3.93 (-1.43%)<br>$\alpha=\beta=90^\circ; \gamma=89.2^\circ$ |
| Cu              | a=b=c=3.91 (-1.68%)<br>$\alpha=\beta=\gamma=90^\circ$ | a=b=3.90; c=3.91 (-1.94%)<br>$\alpha=\beta=90^\circ; \gamma=89.6^\circ$ |
| Ag              | a=b=c=4.01 (0.83%)<br>$\alpha=\beta=\gamma=90^\circ$  | a=b=3.98; c=4.07 (0.08%)<br>$\alpha=\beta=90^\circ; \gamma=90.5^\circ$  |
| Pd              | a=b=c=3.97 (-0.18%)<br>$\alpha=\beta=\gamma=90^\circ$ | a=b=3.97; c=3.96 (-0.18%)<br>$\alpha=\beta=90^\circ; \gamma=90.2^\circ$ |

\*The unit of lattice constants is Ångstrom.

Table S3 The structural parameters of PtM<sub>3</sub> alloy

| Pt : TM = 1 : 3 |                                                       |                                                                         |
|-----------------|-------------------------------------------------------|-------------------------------------------------------------------------|
| metal           | L1 <sub>2</sub> *                                     | L1 <sub>3</sub> *                                                       |
| Fe              | a=b=c=3.74 (-5.96%)<br>$\alpha=\beta=\gamma=90^\circ$ | a=b=3.75; c=3.74 (-5.71%)<br>$\alpha=\beta=90^\circ; \gamma=89.1^\circ$ |
| Co              | a=b=c=3.67 (-7.72%)<br>$\alpha=\beta=\gamma=90^\circ$ | a=b=3.65; c=3.58 (-8.22%)<br>$\alpha=\beta=90^\circ; \gamma=89.6^\circ$ |
| Ni              | a=b=c=3.66 (-7.97%)<br>$\alpha=\beta=\gamma=90^\circ$ | a=b=3.71; c=3.57 (-6.71%)<br>$\alpha=\beta=90^\circ; \gamma=88.3^\circ$ |
| V               | a=b=c=3.84 (-3.44%)<br>$\alpha=\beta=\gamma=90^\circ$ | a=b=3.78; c=3.96 (-4.95%)<br>$\alpha=\beta=90^\circ; \gamma=91.2^\circ$ |
| Cu              | a=b=c=3.74 (-5.96%)<br>$\alpha=\beta=\gamma=90^\circ$ | a=b=3.83; c=3.59 (-3.70%)<br>$\alpha=\beta=90^\circ; \gamma=88.0^\circ$ |
| Ag              | a=b=c=4.10 (3.09%)<br>$\alpha=\beta=\gamma=90^\circ$  | a=b=c=4.10 (3.09%)<br>$\alpha=\beta=\gamma=90^\circ$                    |
| Pd              | a=b=c=3.96 (-0.43%)<br>$\alpha=\beta=\gamma=90^\circ$ | a=b=c=3.96 (-0.43%)<br>$\alpha=\beta=\gamma=90^\circ$                   |

\*The unit of lattice constants is Ångstrom.



Table S4 The  $\Delta U_{\text{diss}}$ ,  $f_i$  and  $\Delta E_i$  of  $L1_0$ -PtTM/Pt<sub>nL</sub> slabs

| Type of order phase | metals | n      | $\Delta U_{\text{diss}}$ (V) | $f_i$  | $\Delta E_i$ (eV) |
|---------------------|--------|--------|------------------------------|--------|-------------------|
| $L1_0$              | Fe     | 1      | 0.282                        | 0.5    | 0.250             |
|                     |        |        | 0.192                        | 0.5    | 0.220             |
|                     |        | 2      | 0.064                        | 0.5    | 0.027             |
|                     |        |        | -0.002                       | 0.5    | 0.043             |
|                     |        | 3      | -0.031                       | 0.5    | -0.010            |
|                     |        |        | -0.003                       | 0.5    | 0.050             |
|                     |        | 4      | -0.028                       | 0.5    | 0.033             |
|                     |        |        | -0.028                       | 0.5    | 0.033             |
|                     | Co     | 1      | 0.198                        | 0.5    | 0.277             |
|                     |        |        | 0.088                        | 0.5    | 0.201             |
|                     |        | 2      | -0.009                       | 0.5    | 0.081             |
|                     |        |        | -0.065                       | 0.5    | 0.049             |
|                     |        | 3      | -0.087                       | 0.5    | 0.027             |
|                     |        |        | -0.068                       | 0.5    | 0.073             |
|                     |        | 4      | -0.100                       | 0.5    | 0.022             |
|                     |        |        | -0.100                       | 0.5    | 0.022             |
|                     | Ni     | 1      | 0.123                        | 0.5    | 0.136             |
|                     |        |        | 0.015                        | 0.5    | 0.303             |
|                     |        | 2      | -0.099                       | 0.5    | 0.099             |
|                     |        |        | -0.045                       | 0.5    | 0.040             |
| 3                   |        | -0.107 | 0.5                          | 0.027  |                   |
|                     |        | -0.121 | 0.5                          | 0.056  |                   |
| 4                   |        | -0.144 | 0.5                          | -0.012 |                   |
|                     |        | -0.144 | 0.5                          | -0.012 |                   |
| V                   | 1      | 0.347  | 0.5                          | 0.182  |                   |
|                     |        | 0.252  | 0.5                          | 0.340  |                   |
|                     | 2      | 0.110  | 0.5                          | 0.011  |                   |
|                     |        | 0.136  | 0.5                          | 0.236  |                   |
|                     | 3      | -0.042 | 0.5                          | -0.117 |                   |
|                     |        | 0.016  | 0.5                          | -0.007 |                   |
|                     | 4      | 0.009  | 0.5                          | 0.035  |                   |
|                     |        | 0.009  | 0.5                          | 0.035  |                   |

Table S5 The  $\Delta U_{\text{diss}}$ ,  $f_i$  and  $\Delta E_i$  of  $L1_1$ -PtTM/Pt<sub>nL</sub> slabs

| Type of order phase | metals | n | $\Delta U_{\text{diss}}$ (V) | $f_i$ | $\Delta E_i$ (eV) |
|---------------------|--------|---|------------------------------|-------|-------------------|
| $L1_1$              | Cu     | 1 | 0.334                        | 1     | 0.412             |
|                     |        | 2 | 0.021                        | 1     | -0.058            |
|                     |        | 3 | 0.055                        | 1     | 0.051             |
|                     |        | 4 | 0.030                        | 1     | 0.023             |
|                     | Ag     | 1 | 0.125                        | 1     | 0.287             |
|                     |        | 2 | -0.113                       | 1     | -0.209            |
|                     |        | 3 | -0.020                       | 1     | -0.066            |
|                     |        | 4 | -0.012                       | 1     | -0.049            |
|                     | Pd     | 1 | 0.123                        | 1     | -0.010            |
|                     |        | 2 | 0.039                        | 1     | 0.001             |
|                     |        | 3 | 0.026                        | 1     | -0.040            |
|                     |        | 4 | 0.026                        | 1     | -0.009            |

Table S6 The  $\Delta U_{\text{diss}}$ ,  $f_i$  and  $\Delta E_i$  of  $L1_2\text{-Pt}_3\text{TM/Pt}_{nL}$  slabs

| Type of order phase | metals | n     | $\Delta U_{\text{diss}}$ (V) | $f_i$  | $\Delta E_i$ (eV) |
|---------------------|--------|-------|------------------------------|--------|-------------------|
| $L1_2$              | Fe     | 1     | 0.219                        | 0.75   | 0.120             |
|                     |        |       | 0.090                        | 0.25   | 0.051             |
|                     |        | 2     | 0.075                        | 0.75   | 0.004             |
|                     |        |       | 0.019                        | 0.25   | 0.003             |
|                     |        | 3     | 0.041                        | 0.75   | -0.001            |
|                     |        |       | 0.073                        | 0.25   | 0.045             |
|                     |        | 4     | 0.034                        | 0.75   | 0.009             |
|                     |        |       | 0.034                        | 0.25   | 0.009             |
|                     | Co     | 1     | 0.195                        | 0.75   | 0.124             |
|                     |        |       | 0.081                        | 0.25   | 0.064             |
|                     |        | 2     | 0.069                        | 0.75   | 0.021             |
|                     |        |       | 0.022                        | 0.25   | 0.034             |
|                     |        | 3     | 0.041                        | 0.75   | 0.023             |
|                     |        |       | 0.058                        | 0.25   | 0.043             |
|                     |        | 4     | 0.030                        | 0.75   | 0.021             |
|                     |        |       | 0.030                        | 0.25   | 0.021             |
|                     | V      | 1     | 0.231                        | 0.75   | 0.053             |
|                     |        |       | 0.016                        | 0.25   | 0.206             |
|                     |        | 2     | 0.083                        | 0.75   | 0.006             |
|                     |        |       | 0.103                        | 0.25   | 0.171             |
| 3                   |        | 0.036 | 0.75                         | -0.016 |                   |
|                     |        | 0.065 | 0.25                         | 0.032  |                   |
| 4                   |        | 0.034 | 0.75                         | 0.009  |                   |
|                     |        | 0.034 | 0.25                         | 0.009  |                   |

Table S7 The  $\Delta U_{\text{diss}}$ ,  $f_i$  and  $\Delta E_i$  of  $L1_3\text{-Pt}_3\text{TM/Pt}_{nL}$  slabs

| Type of order phase | metals | n     | $\Delta U_{\text{diss}}$ (V) | $f_i$  | $\Delta E_i$ (eV) |
|---------------------|--------|-------|------------------------------|--------|-------------------|
| $L1_3$              | Ni     | 1     | 0.214                        | 0.5    | 0.130             |
|                     |        |       | 0.136                        | 0.5    | 0.046             |
|                     |        | 2     | 0.122                        | 0.5    | 0.089             |
|                     |        |       | 0.031                        | 0.5    | -0.003            |
|                     |        | 3     | 0.046                        | 0.5    | 0.023             |
|                     |        |       | 0.058                        | 0.5    | 0.036             |
|                     |        | 4     | 0.028                        | 0.5    | 0.018             |
|                     |        |       | 0.028                        | 0.5    | 0.018             |
|                     | Cu     | 1     | 0.232                        | 0.5    | 0.186             |
|                     |        |       | 0.220                        | 0.5    | 0.056             |
|                     |        | 2     | -0.004                       | 0.5    | -0.108            |
|                     |        |       | 0.163                        | 0.5    | 0.103             |
|                     |        | 3     | 0.038                        | 0.5    | 0.000             |
|                     |        |       | 0.049                        | 0.5    | -0.013            |
|                     |        | 4     | 0.035                        | 0.5    | 0.011             |
|                     |        |       | 0.035                        | 0.5    | 0.011             |
|                     | Ag     | 1     | 0.232                        | 0.5    | 0.042             |
|                     |        |       | 0.220                        | 0.5    | -0.049            |
|                     |        | 2     | -0.004                       | 0.5    | -0.199            |
|                     |        |       | 0.163                        | 0.5    | 0.001             |
| 3                   |        | 0.038 | 0.5                          | -0.079 |                   |
|                     |        | 0.049 | 0.5                          | -0.100 |                   |
| 4                   |        | 0.035 | 0.5                          | -0.052 |                   |
|                     |        | 0.035 | 0.5                          | -0.052 |                   |
| Pd                  | 1      | 0.062 | 0.5                          | -0.012 |                   |
|                     |        | 0.096 | 0.5                          | -0.007 |                   |
|                     | 2      | 0.061 | 0.5                          | 0.014  |                   |
|                     |        | 0.000 | 0.5                          | -0.043 |                   |
|                     | 3      | 0.016 | 0.5                          | -0.033 |                   |
|                     |        | 0.024 | 0.5                          | -0.033 |                   |
|                     | 4      | 0.015 | 0.5                          | -0.034 |                   |
|                     |        | 0.015 | 0.5                          | -0.034 |                   |

Table S8 The  $\Delta U_{\text{diss}}$ ,  $f_i$  and  $\Delta E_i$  of  $L1_2$ -PtTM<sub>3</sub>/Pt<sub>nL</sub> slabs

| Type of order phase | metals | n      | $\Delta U_{\text{diss}}$ (V) | $f_i$  | $\Delta E_i$ (eV) |        |
|---------------------|--------|--------|------------------------------|--------|-------------------|--------|
| $L1_2$              | Fe     | 1      | 0.122                        | 0.25   | 0.415             |        |
|                     |        |        | 0.212                        | 0.75   | 0.401             |        |
|                     |        | 2      | -0.103                       | 0.25   | 0.097             |        |
|                     |        |        | -0.060                       | 0.75   | 0.028             |        |
|                     |        | 3      | -0.201                       | 0.25   | -0.300            |        |
|                     |        |        | -0.225                       | 0.75   | -0.064            |        |
|                     |        | 4      | -0.223                       | 0.25   | -0.093            |        |
|                     |        |        | -0.223                       | 0.75   | -0.093            |        |
|                     |        | V      | 1                            | 0.113  | 0.25              | -0.221 |
|                     |        |        |                              | 0.415  | 0.75              | -0.009 |
|                     |        |        | 2                            | 0.146  | 0.25              | 0.264  |
|                     |        |        |                              | 0.101  | 0.75              | -0.106 |
|                     | 3      |        | -0.009                       | 0.25   | -0.013            |        |
|                     |        |        | -0.059                       | 0.75   | -0.126            |        |
|                     | 4      |        | -0.010                       | 0.25   | 0.036             |        |
|                     |        |        | -0.010                       | 0.75   | 0.036             |        |
|                     | Cu     | 1      | 0.071                        | 0.25   | 0.209             |        |
|                     |        |        | 0.022                        | 0.75   | 0.396             |        |
|                     |        | 2      | -0.209                       | 0.25   | -0.052            |        |
|                     |        |        | -0.058                       | 0.75   | 0.144             |        |
| 3                   |        | -0.187 | 0.25                         | -0.140 |                   |        |
|                     |        | -0.195 | 0.75                         | 0.046  |                   |        |
| 4                   |        | -0.239 | 0.25                         | -0.193 |                   |        |
|                     |        | -0.239 | 0.75                         | -0.193 |                   |        |

Table S9 The  $\Delta U_{\text{diss}}$ ,  $f_i$  and  $\Delta E_{\text{ads}}$  of  $L1_3\text{-PtTM}_3/\text{Pt}_{nL}$  slabs

| Type of order phase | metals | n | $\Delta U_{\text{diss}}$ (V) | $f_i$ | $\Delta E_i$ (eV) |
|---------------------|--------|---|------------------------------|-------|-------------------|
| $L1_3$              | Ag     | 1 | -0.052                       | 0.5   | -0.224            |
|                     |        |   | -0.248                       | 0.5   | -0.526            |
|                     |        | 2 | -0.296                       | 0.5   | -0.314            |
|                     |        |   | -0.318                       | 0.5   | -0.317            |
|                     |        | 3 | -0.181                       | 0.5   | -0.208            |
|                     |        |   | -0.193                       | 0.5   | -0.193            |
|                     |        | 4 | -0.148                       | 0.5   | -0.134            |
|                     |        |   | -0.148                       | 0.5   | -0.134            |
|                     | Pd     | 1 | 0.094                        | 0.5   | -0.002            |
|                     |        |   | 0.061                        | 0.5   | -0.006            |
|                     |        | 2 | 0.040                        | 0.5   | -0.010            |
|                     |        |   | 0.029                        | 0.5   | -0.013            |
|                     |        | 3 | 0.030                        | 0.5   | -0.020            |
|                     |        |   | 0.023                        | 0.5   | -0.022            |
|                     |        | 4 | 0.025                        | 0.5   | -0.013            |
|                     |        |   | 0.025                        | 0.5   | -0.013            |

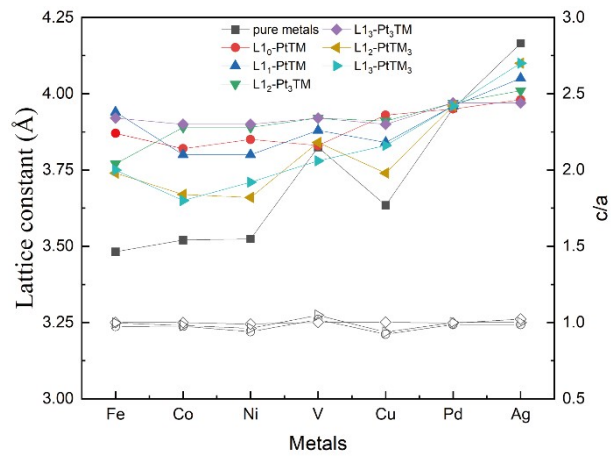

Figure S1 The lattice constants of different metals and alloys assumed as FCC phase
